# Supplementary material for: Nicotine Exposure during Adolescence Leads to Changes of Synaptic Plasticity and Intrinsic Excitability of Mice Insular Pyramidal Cells at Later Life
Source: MDPI journal article supplement (doi:10.3390/ijms23010034), 2021-12-21
Supplement: s1 [file s1]

## Supplemental Material

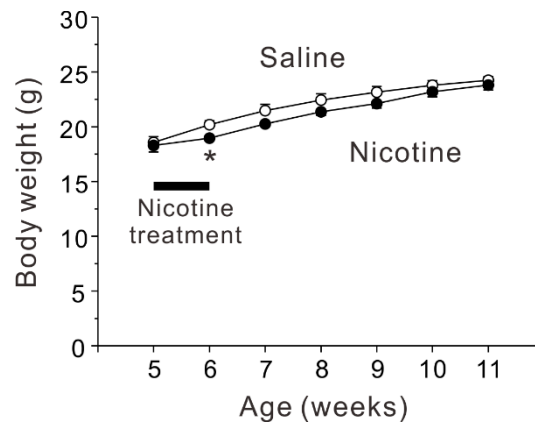

**Supplementary Figure S1.** Effects of adolescent nicotine exposure on body weight in mice. Summary data of body weight obtained from saline-treated mice (open circle,  $n = 6$ ) and nicotine-treated mice (filled circle,  $n = 7$ ). Mice just after one week nicotine exposure (6 weeks of age) had significantly less body weight than saline-treated mice ( $p = 0.036$ ). Before and 1, 2, 3, 4 and 5 weeks after the nicotine treatment, there was no significant difference in body weight between two groups (5 weeks of age,  $p = 0.674$ ; 7 weeks of age,  $p = 0.074$ ; 8 weeks of age,  $p = 0.113$ ; 9 weeks of age,  $p = 0.126$ ; 10 weeks of age,  $p = 0.373$ ; 11 weeks of age,  $p = 0.506$ ). Two-way repeated measures ANOVA post-hoc LSD, \*:  $p < 0.05$ .
